# Supplementary material for: Metabolomic Phenotyping of Gliomas: What Can We Get with Simplified Protocol for Intact Tissue Analysis?
Source: MDPI journal article supplement (doi:10.3390/cancers14020312), 2022-01-09
Supplement: s1 [file s1]

## Supplementary information Table of Contents

|                                                                                                                                                                                                                      |          |
|----------------------------------------------------------------------------------------------------------------------------------------------------------------------------------------------------------------------|----------|
| <b>Table of Contents .....</b>                                                                                                                                                                                       | <b>1</b> |
| <b>Tables .....</b>                                                                                                                                                                                                  | <b>3</b> |
| Table S1. Comparison of the number of features and annotated compounds based on ChemSpider search in patients with brain tumors using PFP and HILIC columns in positive and negative ionization modes. ....          | 3        |
| Table S2: Compounds identified in patients with brain tumors using Chem Spider database. Data for PFP column, ESI+.. ....                                                                                            | 3        |
| Table S3: Statistical performance of PLS-DA model for meningioma and glioma. Data for PFP column in positive ionization mode. ....                                                                                   | 7        |
| Table S4. Statistical performance of OPLS-DA model for patients with/without IDH, with/without codeletion 1p19q, and high- and low-grade gliomas. Data for PFP column in ESI+. OPLS-DA models. ....                  | 8        |
| Table S5. Panel of compounds representing differences between gliomas and meningiomas selected by LASSO using a PFP column in positive ionization mode.....                                                          | 9        |
| Table S6. Compounds differentiating gliomas and meningiomas based on ANOVA using PFP column in positive ionization mode.....                                                                                         | 10       |
| Table S7. Panel of compounds representing differences between high-grade- (stage III and IV) and low-grade-malignancy gliomas (stage I and II) selected by LASSO using a PFP column in positive ionization mode..... | 12       |
| Table S8. Compounds differentiating high-grade- and low-grade-malignancy gliomas based on ANOVA using a PFP column in positive ionization mode. ..                                                                   | 14       |
| Table S9. Panel of compounds representing differences between patient with and without isocitrate dehydrogenase mutations selected by LASSO using a PFP column in positive ionization mode. ....                     | 15       |
| Table S10. Comparison of masses selected by LASSO in the analysis of patients with/without IDH using different columns and ionization modes. ....                                                                    | 16       |
| Table S11. Statistical performance of PLS-DA model for patients with and without IDH mutation. Data for PFP column acquired in ESI- mode; data for HILIC column acquired in ESI+ and ESI- modes. ....                | 17       |
| Table S12. Compounds differentiating patients with and without isocitrate dehydrogenase mutations based on ANOVA using a PFP column in positive ionization mode.....                                                 | 18       |

|                                                                                                                                                                                                                                                                                                                                                                                                                |           |
|----------------------------------------------------------------------------------------------------------------------------------------------------------------------------------------------------------------------------------------------------------------------------------------------------------------------------------------------------------------------------------------------------------------|-----------|
| Table S13. Panel of compounds representing differences between patients with and without 1p19q codeletion selected via the LASSO method using a PFP column in positive ionization mode. ....                                                                                                                                                                                                                   | 19        |
| Table S14. Comparison of masses selected via LASSO for the analysis of patients with/without codeletion using different columns and ionization modes. ....                                                                                                                                                                                                                                                     | 20        |
| Table S15. Statistical performance of PLS-DA for patients with and without 1p19q codeletion. Data for PFP column acquired in ESI- mode; data for HILIC column acquired in ESI+ and ESI- mode. ....                                                                                                                                                                                                             | 21        |
| Table S16. Compounds differentiating patients with and without 1p19q codeletion selected via ANOVA using a PFP column in positive ionization mode. ....                                                                                                                                                                                                                                                        | 22        |
| <b>Figures</b> .....                                                                                                                                                                                                                                                                                                                                                                                           | <b>23</b> |
| Figure S1. PLS-DA scores plots presenting differences between groups of patients with and without IDH mutations. Patients with IDH mutations—blue circles; patients without IDH mutations—green squares. Analyses were performed on an HILIC column in negative ionization mode (Model 5), an HILIC column in positive ionization mode (Model 6), and a PFP column in negative ionization mode (Model 7). .... | 23        |
| Figure S2. PLS-DA score plots showing differences between groups of patients with and without codeletion 1p19q. Patients with codeletion—blue circles; patients without codeletion—green squares. Analyses were performed on an HILIC column in negative ionization mode (Model 8); an HILIC column in positive ionization mode (Model 9); and a PFP column in negative ionization mode (Model 10). ....       | 24        |

Table S1. Comparison of the number of features and annotated compounds based on ChemSpider search in patients with brain tumors using PFP and HILIC columns in positive and negative ionization modes

|                                                          | Ionization mode |         |           |           |
|----------------------------------------------------------|-----------------|---------|-----------|-----------|
|                                                          | PFP (+)         | PFP (-) | HILIC (+) | HILIC (-) |
| Number of features                                       | 338             | 201     | 124       | 113       |
| Number of annotated compounds based on ChemSpider search | 200             | 44      | 51        | 31        |

Table S2. Compounds identified in patients with brain tumors using Chem Spider database. Data for PFP column, ESI+.

| Name                  | Formula      | Molecular Weight | Retention Time [min] |
|-----------------------|--------------|------------------|----------------------|
| dimethylformamide     | C3 H7 N O    | 73.05275         | 1.46                 |
| FLUORACETIC ACID      | C2 H3 F O2   | 78.01193         | 1.449                |
| Proline               | C5 H9 N O2   | 83.03732         | 1.462                |
| Phosphoric acid       | H3 O4 P      | 97.9772          | 18.843               |
| L-(-)-Serine          | C3 H7 N O3   | 105.04292        | 1.356                |
| Hypotaurine           | C2 H7 N O2 S | 109.01978        | 1.094                |
| 3,4-Diaminopyridine   | C5 H7 N3     | 109.06431        | 2.045                |
| Uracil                | C4 H4 N2 O2  | 112.02752        | 1.459                |
| Creatinine            | C4 H7 N3 O   | 113.05925        | 3.768                |
| Proline               | C5 H9 N O2   | 115.06356        | 1.459                |
| tuaminoheptane        | C7 H17 N     | 115.13629        | 11.37                |
| tuaminoheptane        | C7 H17 N     | 115.13629        | 11.057               |
| tuaminoheptane        | C7 H17 N     | 115.13629        | 11.195               |
| tuaminoheptane        | C7 H17 N     | 115.13635        | 10.972               |
| tuaminoheptane        | C7 H17 N     | 115.13636        | 10.861               |
| 1-Ethyl-1-nitrosourea | C3 H7 N3 O2  | 117.05405        | 1.971                |
| Indole                | C8 H7 N      | 117.05802        | 22.355               |

|                     |              |           |        |
|---------------------|--------------|-----------|--------|
| L-(+)-Valine        | C5 H11 N O2  | 117.0791  | 3.293  |
| alpha-methylstyrene | C9 H10       | 118.0786  | 17.784 |
| L-(-)-Threonine     | C4 H9 N O3   | 119.05841 | 1.425  |
| Phenylethanolamine  | C8 H9 N      | 119.07373 | 9.566  |
| Nicotinamide        | C6 H6 N2 O   | 122.04822 | 4.052  |
| Taurine             | C2 H7 N O3 S | 125.01471 | 1.079  |
| L-Pyroglutamic acid | C5 H7 N O3   | 129.04252 | 1.381  |
| L-Pyroglutamic acid | C5 H7 N O3   | 129.04261 | 1.467  |
| DL-Lysine           | C6 H14 N2 O2 | 129.07902 | 2.039  |
| Aminolevulinic acid | C5 H9 N O3   | 131.05824 | 1.275  |
| Creatine            | C4 H9 N3 O2  | 131.06953 | 2.467  |
| L-(+)-Leucine       | C6 H13 N O2  | 131.0947  | 7.709  |
| Leucine             | C6 H13 N O2  | 131.0947  | 8.13   |
| L-(-)-Asparagine    | C4 H8 N2 O3  | 132.0535  | 1.334  |
| L-Aspartic acid     | C4 H7 N O4   | 133.03749 | 1.333  |
| Cinnamyl alcohol    | C9 H10 O     | 134.07322 | 17.783 |
| Cinnamyl alcohol    | C9 H10 O     | 134.07324 | 16.438 |
| Adenine             | C5 H5 N5     | 135.05461 | 7.785  |
| Acetanilide         | C8 H9 N O    | 135.06846 | 7.852  |
| Hypoxanthin         | C5 H4 N4 O   | 136.03852 | 1.461  |
| Hypoxanthin         | C5 H4 N4 O   | 136.03854 | 7.042  |
| 4-Nitroaniline      | C6 H6 N2 O2  | 138.04296 | 7.644  |
| DL-Lysine           | C6 H14 N2 O2 | 146.10547 | 2.042  |
| DL-Glutamic acid    | C5 H9 N O4   | 147.05314 | 1.47   |
| Triethanolamine     | C6 H15 N O3  | 149.10526 | 2.582  |
| Guanine             | C5 H5 N5 O   | 151.04945 | 1.46   |
| Paracetamol         | C8 H9 N O2   | 151.06336 | 8.207  |
| Xanthine            | C5 H4 N4 O2  | 152.03336 | 1.459  |
| (+/-)-Camphor       | C10 H16 O    | 152.12021 | 16.701 |

|                                                                    |                |           |        |
|--------------------------------------------------------------------|----------------|-----------|--------|
| L-Histidine                                                        | C6 H9 N3 O2    | 155.06954 | 2.044  |
| L-(+)-Citrulline                                                   | C6 H13 N3 O3   | 158.06912 | 1.466  |
| L-2-Aminoadipic acid                                               | C6 H11 N O4    | 161.06877 | 1.722  |
| DL-Carnitine                                                       | C7 H15 N O3    | 161.10523 | 4.298  |
| L-Tyrosine                                                         | C9 H11 N O3    | 164.04742 | 7.849  |
| L-Phenylalanine                                                    | C9 H11 N O2    | 165.07907 | 9.565  |
| DL-Arginine                                                        | C6 H14 N4 O2   | 174.11169 | 2.368  |
| L-(+)-Citrulline                                                   | C6 H13 N3 O3   | 175.09567 | 1.462  |
| 4-Methoxycinnamic acid                                             | C10 H10 O3     | 178.06298 | 22.296 |
| Hexitol                                                            | C6 H14 O6      | 182.07899 | 1.113  |
| Indoleacrylic acid                                                 | C11 H9 N O2    | 187.06337 | 12.284 |
| Tryptophanamide                                                    | C11 H13 N3 O   | 203.10593 | 12.09  |
| Acetyl-L-carnitine                                                 | C9 H17 N O4    | 203.11586 | 9.595  |
| Maraniol                                                           | C12 H12 O3     | 204.0787  | 20.501 |
| 4-(1,2-Dihydroxy-2-propanyl)-1-methyl-1,2-cyclohexanediol          | C10 H20 O4     | 204.13606 | 13.966 |
| 4-(1,2-Dihydroxy-2-propanyl)-1-methyl-1,2-cyclohexanediol          | C10 H20 O4     | 204.13606 | 14.007 |
| 4-(1,2-Dihydroxy-2-propanyl)-1-methyl-1,2-cyclohexanediol          | C10 H20 O4     | 204.13618 | 14.069 |
| (2Z)-2-Benzylidene-1-heptanol                                      | C14 H20 O      | 204.15131 | 21.513 |
| 2-Decylfuran                                                       | C14 H24 O      | 208.18274 | 16.701 |
| UNII:240I539PWQ                                                    | C5 H14 N O6 P  | 215.05573 | 1.075  |
| 1,5-Dimethyl-4-(methylamino)-2-phenyl-1,2-dihydro-3H-pyrazol-3-one | C12 H15 N3 O   | 217.12149 | 12.97  |
| Propionylcarnitine                                                 | C10 H19 N O4   | 217.13134 | 11.713 |
| 2,2,4,4,6,6-Hexamethyl-1,3,5-trithiane                             | C9 H18 S3      | 222.05627 | 15.4   |
| 2,2,4,4,6,6-Hexamethyl-1,3,5-trithiane                             | C9 H18 S3      | 222.05634 | 24.971 |
| Cystathionine                                                      | C7 H14 N2 O4 S | 222.06734 | 1.487  |
| N-(tert-Butoxycarbonyl)-L-leucine                                  | C11 H21 N O4   | 231.14696 | 14.741 |
| Acetyl-L-tryptophanamide                                           | C13 H15 N3 O2  | 245.1164  | 8.289  |
| Tolperisone                                                        | C16 H23 N O    | 245.17782 | 21.509 |
| Pindolol                                                           | C14 H20 N2 O2  | 248.15229 | 20.736 |

|                                                                       |                  |           |        |
|-----------------------------------------------------------------------|------------------|-----------|--------|
| 7-Methyl-2,6,9,12-tetraoxahexadecane                                  | C13 H28 O4       | 248.19857 | 14.435 |
| Tolmetin                                                              | C15 H15 N O3     | 257.10253 | 1.199  |
| UNII:Z5JO63XGNK                                                       | C17 H26 O2       | 262.19314 | 20.828 |
| Tributyl phosphate                                                    | C12 H27 O4 P     | 266.16463 | 18.839 |
| 2-Amino-9-(2-deoxypentofuranosyl)-3,9-dihydro-6H-purin-6-one          | C10 H13 N5 O4    | 267.0966  | 7.781  |
| Arabinosylhypoxanthine                                                | C10 H12 N4 O5    | 268.08055 | 7.042  |
| Kaur-16-ene                                                           | C20 H32          | 272.24993 | 23.057 |
| gamma-Glu-gln                                                         | C10 H17 N3 O6    | 275.11152 | 1.459  |
| Dibutyl phthalate                                                     | C16 H22 O4       | 278.15166 | 20.504 |
| (9E,12E,15E)-9,12,15-Octadecatrienoic acid                            | C18 H30 O2       | 278.22443 | 21.514 |
| Linoleamide                                                           | C18 H33 N O      | 279.25604 | 20.415 |
| Phaseic acid                                                          | C15 H20 O5       | 280.13094 | 17.787 |
| Methyl 15-cyanopentadecanoate                                         | C17 H31 N O2     | 281.23534 | 21.031 |
| 8-hydroxy-deoxyguanosine                                              | C10 H13 N5 O5    | 283.09143 | 1.463  |
| Stearamide                                                            | C18 H37 N O      | 283.28729 | 21.915 |
| Stearamide                                                            | C18 H37 N O      | 283.2873  | 22.756 |
| all-trans-retinal                                                     | C20 H28 O        | 284.21387 | 21.886 |
| N-Tetradecanoylglycine                                                | C16 H31 N O3     | 285.23027 | 20.265 |
| N,N-Bis(2-hydroxyethyl)dodecanamide                                   | C16 H33 N O3     | 287.24578 | 24.566 |
| octyl methoxycinnamate                                                | C18 H26 O3       | 290.18799 | 22.299 |
| 1-Hexadecanoylpyrrolidine                                             | C20 H39 N O      | 309.30298 | 22.17  |
| 1-(14-methylhexadecanoyl)pyrrolidine                                  | C21 H41 N O      | 323.31873 | 22.634 |
| (2E,4E,12Z)-N-Isobutyl-2,4,12-octadecatrienamide                      | C22 H39 N O      | 333.30297 | 21.873 |
| (2E,4Z)-N-Isobutyl-2,4-octadecadienamide                              | C22 H41 N O      | 335.31855 | 22.439 |
| (2E,4Z)-N-Isobutyl-2,4-octadecadienamide                              | C22 H41 N O      | 335.31859 | 19.905 |
| Docosanamide                                                          | C22 H45 N O      | 339.34988 | 23.9   |
| Eplerenone                                                            | C24 H30 O6       | 414.20424 | 17.78  |
| Cefazolin                                                             | C14 H14 N8 O4 S3 | 454.03011 | 10.379 |
| 1-stearoyl-2-arachidonoyl-sn-glycero-3-phosphoethanolamine zwitterion | C43 H78 N O8 P   | 767.54611 | 25.486 |

Table S3. Statistical performance of PLS-DA model for meningioma and glioma. Data for PFP column in positive ionization mode.

| <b>Parameter</b>                  | <b>Model 4</b>                |         |
|-----------------------------------|-------------------------------|---------|
| <b>Classes</b>                    | Men                           | LGG+HGG |
| <b>Data preprocessing</b>         | Log <sub>10</sub> , autoscale |         |
| <b>N</b>                          | 17                            | 19      |
| <b>Number of LV</b>               | 2                             |         |
| <b>RMSEC</b>                      | 0.106                         | 0.106   |
| <b>RMSECV</b>                     | 0.133                         | 0.133   |
| <b>R<sup>2</sup>(calibration)</b> | 0.954                         | 0.954   |
| <b>R<sup>2</sup>(CV)</b>          | 0.928                         | 0.928   |
| <b>NMC</b>                        | 0                             |         |
| <b>AUROC</b>                      |                               |         |
| <b>Calibration</b>                | 1.000                         | 1.000   |
| <b>Cross-validation</b>           | 1.000                         | 1.000   |

AUROC – Area Under the Operating Receiver; NMC – Number of misclassification; RMSEC – Root Mean Square Error of Calibration; RMSECV – Root Mean Square Error of Cross-validation;

Table S4. Statistical performance of OPLS-DA model for patients with/without IDH, with/without codeletion 1p19q, and high- and low-grade gliomas. Data for PFP column in ESI+. OPLS-DA models.

| Parameter                    | Model 1                       |       | Model 2                       |             | Model 3                       |                  |
|------------------------------|-------------------------------|-------|-------------------------------|-------------|-------------------------------|------------------|
| Classes                      | LGG                           | HGG   | IDH                           | lack of IDH | deletion                      | without deletion |
| Data preprocessing           | Log <sub>10</sub> , autoscale |       | Log <sub>10</sub> , autoscale |             | Log <sub>10</sub> , autoscale |                  |
| N                            | 7                             | 12    | 10                            | 9           | 7                             | 12               |
| Number of LV                 | 4                             |       | 3                             |             | 2                             |                  |
| RMSEC                        | 0.125                         | 0.125 | 0.096                         | 0.096       | 0.651                         | 0.401            |
| RMSECV                       | 0.491                         | 0.491 | 0.203                         | 0.203       | 0.679                         | 0.462            |
| R <sup>2</sup> (calibration) | 0.932                         | 0.932 | 0.963                         | 0.963       | 0.894                         | 0.894            |
| R <sup>2</sup> (CV)          | 0.163                         | 0.163 | 0.836                         | 0.836       | 0.714                         | 0.714            |
| NMC                          | 0                             |       | 0                             |             | 0                             |                  |
| AUROC                        |                               |       |                               |             |                               |                  |
| Calibration                  | 1.000                         | 1.000 | 1.000                         | 1.000       | 1.000                         | 1.000            |
| Cross-validation             | 0.738                         | 0.736 | 1.000                         | 1.000       | 1.000                         | 1.000            |

AUROC – Area Under the Operating Receiver; NMC – Number of misclassification; RMSEC – Root Mean Square Error of Calibration; RMSECV – Root Mean Square Error of Cross-validation;



Table S5. Panel of compounds representing differences between gliomas and meningiomas selected by LASSO using a PFP column in positive ionization mode.

| <b>Molecular weight</b> | <b>p-value</b> | <b>p-value correction</b> | <b>Ratio [HGG+LGG/Men]</b> | <b>Identification</b>                                                                                                            |
|-------------------------|----------------|---------------------------|----------------------------|----------------------------------------------------------------------------------------------------------------------------------|
| 89.0481                 | <0.00001       | <0.0005                   | 0.25                       | -                                                                                                                                |
| 132.0535                | <0.00005       | <0.0005                   | 0.25                       | Ureidopropionic acid <sup>#</sup><br>Asparagine <sup>#</sup><br>Glycyl-glycine <sup>#</sup><br>N-Carbamoylsarcosine <sup>#</sup> |
| 257.1025                | <0.00005       | <0.0005                   | 22.13                      | Glycerolphosphorylcholine <sup>#</sup>                                                                                           |
| 152.0333                | <0.0005        | <0.001                    | 3.91                       | <b>Xanthine</b> <sup>#</sup><br>Oxypurinol <sup>#</sup><br>6,8-Dihydroxypurine <sup>#</sup>                                      |
| 146.1055                | <0.0005        | <0.001                    | 0.37                       | Lysine <sup>*</sup>                                                                                                              |
| 131.0694                | <0.0005        | <0.001                    | 3.06                       | Creatine <sup>*</sup>                                                                                                            |
| 289.127                 | <0.0005        | <0.005                    | 0.08                       | ophthalmic acid <sup>#</sup>                                                                                                     |
| 133.0375                | <0.001         | <0.005                    | 0.22                       | Aspartic acid <sup>*</sup>                                                                                                       |
| 175.0956                | <0.005         | <0.005                    | 1.66                       | Citruline <sup>*</sup>                                                                                                           |
| 343.9939                | <0.005         | <0.005                    | 0.42                       | -                                                                                                                                |
| 232.9746                | <0.005         | <0.01                     | 0.26                       | -                                                                                                                                |
| 125.0147                | <0.005         | <0.01                     | 0.39                       | Taurine <sup>#</sup>                                                                                                             |
| 280.1419                | <0.01          | <0.01                     | 2.79                       | <b>Valyltyrosine</b> <sup>#</sup><br><b>Tyrosyl-Valine</b> <sup>#</sup>                                                          |
| 384.1217                | <0.01          | <0.01                     | 2.08                       | <b>S-Adenosylhomocysteine</b> <sup>#</sup>                                                                                       |
| 245.1622                | <0.01          | <0.05                     | 10.49                      | 2-Methylbutyrylcarnitine <sup>#</sup><br>Isovalerylcarnitine <sup>#</sup><br>Pivaloylcarnitine <sup>#</sup>                      |
| 245.1161                | <0.05          | <0.05                     | 0.09                       |                                                                                                                                  |
| 262.0738                | <0.1           | <0.1                      | 0.28                       | -                                                                                                                                |

*note: [\*]compounds identified based on fragmentation spectra; [#]compounds identified based on accurate parent mass*

Table S6. Compounds differentiating gliomas and meningiomas based on ANOVA using PFP column in positive ionization mode.

| <b>Molecular weight</b> | <b>p-value</b>  | <b>p-value correction</b> | <b>Ratio [HGG+LGG/Men]</b> | <b>Identification</b>                          |
|-------------------------|-----------------|---------------------------|----------------------------|------------------------------------------------|
| 222.0673                | <0.01           | >0.5                      | 156.75                     | Cystathionine*                                 |
| 133.0375                | <0.05           | >0.5                      | 0.22                       | Aspartic acid*                                 |
| 174.1116                | <0.05           | >0.5                      | 0.26                       | Arginine*                                      |
| 146.1055                | <0.05           | >0.5                      | 0.28                       | Lysine*                                        |
| 350.0957                | <0.000000000001 | <0.0000000005             | 0.003                      |                                                |
| 175.0480                | <0.00000000005  | <0.00000005               | 0.02                       | N-Acetyl-L-aspartic acid <sup>#</sup>          |
| 257.1025                | <0.000000001    | <0.00000005               | 0.04                       | L-alpha-Glycerolphosphorylcholine <sup>#</sup> |
| 157.0374                | <0.000000005    | <0.00000005               | 0.06                       | Furaspor <sup>#</sup>                          |
| 222.0672                | <0.00000001     | <0.000001                 | 0.02                       | cystathionine <sup>#</sup>                     |
| 197.0799                | <0.00000005     | <0.000005                 | 0.05                       | N-Acetyl-L-histidine <sup>#</sup>              |
| 351.1098                | <0.0000005      | <0.00005                  | 0.04                       |                                                |
| 245.1624                | <0.000005       | <0.0005                   | 0.04                       | 2-methylbutyrylcarnitine <sup>#</sup>          |
| 151.0494                | <0.00001        | <0.0005                   | 28.29                      | Guanine <sup>#</sup>                           |
| 289.1270                | <0.00001        | <0.0005                   | 13.38                      | ophthalmic acid <sup>#</sup>                   |
| 791.5458                | <0.00001        | <0.0005                   | 0.14                       |                                                |
| 245.1622                | <0.00001        | <0.0005                   | 0.07                       | 2-methylbutyrylcarnitine <sup>#</sup>          |
| 231.1467                | <0.00005        | <0.0005                   | 0.11                       | N-(tert-Butoxycarbonyl)-L-leucine <sup>#</sup> |
| 89.0481                 | <0.00005        | <0.001                    | 4.21                       |                                                |
| 152.0333                | <0.00005        | <0.001                    | 0.28                       | Xanthine <sup>#</sup>                          |
| 89.0481                 | <0.0001         | <0.005                    | 3.72                       |                                                |
| 132.0535                | <0.0005         | <0.005                    | 3.60                       | L-(-)-Asparagine <sup>#</sup>                  |
| 304.0902                | <0.0005         | <0.005                    | 0.17                       | Spaglumic acid <sup>#</sup>                    |
| 133.0375                | <0.0005         | <0.01                     | 4.00                       | L-(+)-Aspartic acid <sup>#</sup>               |
| 131.0694                | <0.0005         | <0.01                     | 0.26                       | Creatine <sup>#</sup>                          |
| 343.9939                | <0.0005         | <0.05                     | 2.31                       |                                                |
| 103.0636                | <0.0005         | <0.05                     | 0.13                       | gamma-Aminobutyric acid <sup>#</sup>           |

|          |                 |                   |       |                                            |
|----------|-----------------|-------------------|-------|--------------------------------------------|
| 161.0687 | <0.001          | <0.02151498622798 | 7.32  | .alpha.-Aminoadipic acid <sup>#</sup>      |
| 203.0794 | <0.001          | <0.05             | 2.26  | N-acetyl-L-2-aminoadipic acid <sup>#</sup> |
| 158.0690 | <0.005          | <0.05             | 0.51  | oxiracetam <sup>#</sup>                    |
| 113.0591 | <0.005          | <0.05             | 0.56  | Creatinine <sup>#</sup>                    |
| 146.1055 | <0.005          | <0.05             | 2.19  | DL-Lysine <sup>#</sup>                     |
| 129.0789 | <0.005          | <0.05             | 2.13  | Vigabatrin <sup>#</sup>                    |
| 663.1080 | <0.005          | <0.05             | 8.40  |                                            |
| 203.1057 | <0.005          | <0.05             | 13.45 | Tryptophanamide <sup>#</sup>               |
| 125.0147 | <0.005          | <0.05             | 2.65  | Taurine <sup>#</sup>                       |
| 226.0038 | <0.005          | <0.05             | 0.26  |                                            |
| 174.1116 | <0.005          | <0.05             | 1.78  | DL-Arginine <sup>#</sup>                   |
| 149.0510 | <0.005          | <0.05             | 1.88  | L-(-)-methionine <sup>#</sup>              |
| 490.1478 | <0.005          | <0.05             | 0.22  |                                            |
| 175.0956 | <0.005          | <0.05             | 0.50  | DL-Citrulline <sup>#</sup>                 |
| 249.1111 | <0.005          | <0.05             | 1.26  | Oxibendazole <sup>#</sup>                  |
| 115.0635 | <0.005          | <0.05             | 2.55  | L-Proline <sup>#</sup>                     |
| 350.0957 | <0.000000000001 | <0.0000000005     | 0.003 |                                            |

*note: [\*]compounds identified based on fragmentation spectra; [#]compounds identified based on accurate parent mass*

Table S7. Panel of compounds representing differences between high-grade- (stage III and IV) and low-grade-malignancy gliomas (stage I and II) selected by LASSO using a PFP column in positive ionization mode.

| <b>Molecular weight</b> | <b>P-value</b> | <b>P-value correction</b> | <b>Ratio [HGG/LGG]</b> | <b>Identification</b>                                                                                                                                                                |
|-------------------------|----------------|---------------------------|------------------------|--------------------------------------------------------------------------------------------------------------------------------------------------------------------------------------|
| 113.0591                | <0.1           | <0.5                      | 0.51                   | Creatinine*                                                                                                                                                                          |
| 119.0583                | <0.05          | <0.5                      | 2.01                   | Threonine*                                                                                                                                                                           |
| 131.0583                | <0.05          | <0.1                      | 3.56                   | Aminolevulinic acid*                                                                                                                                                                 |
| 161.0687                | <0.05          | <0.5                      | 15.89                  | 2-aminoadipic acid*                                                                                                                                                                  |
| 203.0794                | >0.5           | >0.5                      | 1.14                   | N-acetyl-L-2-aminoadipate(2-) <sup>#</sup>                                                                                                                                           |
| 225.1210                | <0.01          | <0.5                      | 3.40                   |                                                                                                                                                                                      |
| 242.9827                | >0.5           | >0.5                      | 0.26                   | -                                                                                                                                                                                    |
| 245.1622                | <0.05          | <0.5                      | 8.21                   | 2-Methylbutyroylcarnitine <sup>#</sup><br>Isovaleryl carnitine <sup>#</sup><br>Pivaloylcarnitine <sup>#</sup>                                                                        |
| 280.1420                | <0.5           | <0.5                      | 1.61                   | Valyltyrosine <sup>#</sup><br><b>Tyrosyl-Valine<sup>#</sup></b><br><b>Feruloyl-2-hydroxyputrescine<sup>#</sup></b>                                                                   |
| 347.0628                | <0.5           | <0.5                      | 1.29                   | Adenosine monophosphate <sup>#</sup><br>2'-Deoxyguanosine 5'-monophosphate <sup>#</sup><br>3'-AMP <sup>#</sup><br>Adenosine 2'-phosphate <sup>#</sup><br>2-hydroxy-dAMP <sup>#</sup> |
| 377.8930                | >0.5           | >0.5                      | 0.99                   | -                                                                                                                                                                                    |
| 378.2299                | <0.5           | >0.5                      | 0.72                   | Doxapram <sup>#</sup>                                                                                                                                                                |
| 426.0875                | <0.5           | >0.5                      | 1.26                   | Cysteineglutathione disulfide (Cys-SG) <sup>#</sup>                                                                                                                                  |
| 430.3079                | >0.5           | >0.5                      | 5.77                   | <b>25-Hydroxyvitamin D3-26,23-lactol<sup>#</sup></b><br><b>24-Oxo-1alpha,25-dihydroxyvitamin D3<sup>#</sup></b><br><b>(25R)-3beta-hydroxycholest-5-en-7-one-26-oate<sup>#</sup></b>  |

|          |      |      |      |   |
|----------|------|------|------|---|
| 431.2880 | <0.1 | <0.5 | 4.60 | - |
| 684.1794 | <0.5 | >0.5 | 0.92 | - |

*note: [\*]compounds identified based on fragmentation spectra; [#]compounds identified based on accurate parent mass*

Table S8. Compounds differentiating high-grade- and low-grade-malignancy gliomas based on ANOVA using a PFP column in positive ionization mode.

| <b>Molecular weight</b> | <b>P-value</b> | <b>P-value correction</b> | <b>Ratio [HGG/LGG]</b> | <b>Identification</b>              |
|-------------------------|----------------|---------------------------|------------------------|------------------------------------|
| 165.0789                | <0.05          | >0.5                      | 2.22                   | Phenylalanine <sup>*</sup>         |
| 115.0635                | <0.005         | <0.5                      | 3.01                   | Proline <sup>*</sup>               |
| 161.0687                | <0.05          | >0.5                      | 11.33                  | 2-Aminoadipic acid <sup>*</sup>    |
| 217.1312                | <0.001         | <0.1                      | 14.36                  | Propionylcarnitine <sup>*</sup>    |
| 181.0738                | <0.05          | >0.5                      | 1.88                   | Tyrosine <sup>*</sup>              |
| 168.0282                | <0.05          | >0.5                      | 3.08                   | Uric acid <sup>*</sup>             |
| 217.1312                | <0.00001       | <0.005                    | 15                     | Propionylcarnitine <sup>#</sup>    |
| 161.1051                | <0.0001        | <0.01                     | 7.3                    | Carnitine <sup>#</sup>             |
| 245.1624                | <0.0001        | <0.01                     | 25.07                  |                                    |
| 117.0539                | <0.00005       | <0.01                     | 17.06                  | 1-ethyl-1-nitrosourea <sup>#</sup> |
| 109.0200                | <0.0005        | <0.05                     | 11.85                  | Hypotaurine <sup>#</sup>           |
| 115.0635                | <0.0005        | <0.05                     | 3.27                   | Proline <sup>#</sup>               |
| 245.1623                | <0.0005        | <0.05                     | 7.25                   |                                    |

*note: [\*]compounds identified based on fragmentation spectra; [#]compounds identified based on accurate parent mass*

Table S9. Panel of compounds representing differences between patient with and without isocitrate dehydrogenase mutations selected by LASSO using a PFP column in positive ionization mode.

| <b>Molecular weight</b> | <b>P-value</b> | <b>P-value correction</b> | <b>Ratio [IDH/no-IDH]</b> | <b>Identification</b>            |
|-------------------------|----------------|---------------------------|---------------------------|----------------------------------|
| 89.0481                 | <0.5           | <0.5                      | 0.32                      | -                                |
| 103.0999                | <0.05          | <0.05                     | 0.26                      | Neurine <sup>#</sup>             |
| 113.0591                | <0.05          | <0.05                     | 0.42                      | Creatinine <sup>*</sup>          |
| 119.0583                | <0.05          | <0.05                     | 0.28                      | Threonine <sup>*</sup>           |
| 131.0583                | <0.05          | <0.05                     | 7.89                      | Aminolevulinic acid <sup>*</sup> |
| 161.1051                | <0.01          | <0.1                      | 0.45                      | Carnitine <sup>*</sup>           |
| 225.1210                | <0.01          | <0.05                     | 2.18                      | -                                |
| 242.9827                | <0.05          | <0.05                     | 1.51                      | -                                |
| 245.1622                | <0.05          | <0.05                     | 0.19                      | -                                |
| 296.2825                | <0.01          | <0.05                     | 0.48                      | -                                |
| 426.0875                | <0.05          | <0.05                     | 0.04                      | -                                |
| 431.2880                | <0.05          | <0.05                     | 0.48                      | -                                |

*note: [\*]compounds identified based on fragmentation spectra; [#]compounds identified based on accurate parent mass*

Table S10: Comparison of masses selected by LASSO in the analysis of patients with/without IDH using different columns and ionization modes.

| IDH                    |                        |                      |                      |
|------------------------|------------------------|----------------------|----------------------|
| <b>HILIC_neg</b>       | <b>HILIC_pos</b>       | <b>PFP_neg</b>       | <b>PFP_pos</b>       |
| <i>(HILIC_neg_H38)</i> | <i>(HILIC_pos_H30)</i> | <i>(PFP_neg_H30)</i> | <i>(PFP_pos_D30)</i> |
|                        | 105.0792               |                      |                      |
|                        | 113.0591               |                      |                      |
| 125.9971               | 115.0635               | 112.0257             | 89.0481              |
| 136.0356               | 129.1515               | 132.0522             | 103.0999             |
| 148.0358               | 152.1313               | 136.0358             | 113.0591             |
| 157.0361               | 165.0789               | 168.0272             | 119.0583             |
| 161.0676               | 203.1157               | 196.0575             | 131.0583             |
| 182.0782               | 215.0557               | 247.9576             | 161.1051             |
| 248.0481               | 252.1472               | 255.1318             | 225.121              |
| 256.2399               | 255.2558               | 265.9417             | 242.9827             |
| 289.0015               | 270.0509               | 272.902              | 245.1622             |
| 344.0332               | 287.1914               | 328.2401             | 296.2825             |
|                        | 353.3039               | 426.0884             | 426.0875             |
|                        | 925.2621               |                      | 431.288              |
|                        | 931.7542               |                      |                      |



Table S11. Statistical performance of PLS-DA model for patients with and without IDH mutation. Data for PFP column acquired in ESI- mode; data for HILIC column acquired in ESI+ and ESI- modes.

| <b>Parameter</b>                     | <b>Model 5</b><br>(HILIC_neg) |             | <b>Model 6</b><br>(HILIC_pos) |             | <b>Model 7</b><br>(PFP_neg) |             |
|--------------------------------------|-------------------------------|-------------|-------------------------------|-------------|-----------------------------|-------------|
| <b>Classes</b>                       | IDH                           | lack of IDH | IDH                           | lack of IDH | IDH                         | lack of IDH |
| <b>N</b>                             | 10                            | 9           | 10                            | 9           | 10                          | 9           |
| <b>Data preprocessing</b>            | autoscale                     |             | autoscale                     |             | autoscale                   |             |
| <b>Number of LV</b>                  | 2                             |             | 2                             |             | 2                           |             |
| <b>RMSEC</b>                         | 0.198                         | 0.198       | 0.205                         | 0.205       | 0.128                       | 0.128       |
| <b>RMSECV</b>                        | 0.321                         | 0.321       | 0.374                         | 0.374       | 0.231                       | 0.231       |
| <b>R<sup>2</sup>(calibration)</b>    | 0.843                         | 0.843       | 0.832                         | 0.832       | 0.934                       | 0.934       |
| <b>R<sup>2</sup>(CV)</b>             | 0.698                         | 0.698       | 0.468                         | 0.468       | 0.792                       | 0.792       |
| <b>NMC</b>                           |                               |             |                               |             |                             |             |
| <b>Calibration</b>                   | 0                             | 0           | 0                             | 0           | 0                           | 0           |
| <b>Cross-validation</b>              | 1                             | 0           | 2                             | 2           | 0                           | 0           |
| <b>AUROC</b>                         |                               |             |                               |             |                             |             |
| <b>Calibration</b>                   | 1.000                         | 1.000       | 1.000                         | 1.000       | 1.000                       | 1.000       |
| <b>Cross-validation</b>              | 0.856                         | 0.856       | 0.922                         | 0.922       | 1.000                       | 1.000       |
| <b>Permutation test</b><br>(N = 150) |                               |             |                               |             |                             |             |
| <b>Self-Prediction</b>               | Passed                        |             | Failed                        |             | Passed                      |             |
| <b>Cross-validated</b>               | Failed                        |             | Failed                        |             | Passed                      |             |

Table S12. Compounds differentiating patients with and without isocitrate dehydrogenase mutations based on ANOVA using a PFP column in positive ionization mode.

| <b>Molecular weight</b> | <b>P-value</b> | <b>P-value correction</b> | <b>Ratio [no-IDH /IDH]</b> | <b>Identification</b>                |
|-------------------------|----------------|---------------------------|----------------------------|--------------------------------------|
| 203.1156                | <0.05          | <0.5                      | 3.22                       | Acetyl-L-carnitine*                  |
| 165.0789                | <0.01          | <0.5                      | 2.11                       | Phenylalanine*                       |
| 168.0282                | <0.01          | <0.5                      | 2.83                       | Uric acid*                           |
| 115.0635                | <0.01          | <0.5                      | 2.98                       | Proline*                             |
| 161.0687                | <0.005         | <0.5                      | 16.97                      | 2-Aminoadipic acid*                  |
| 217.1312                | <0.01          | <0.5                      | 11.05                      | Propionylcarnitine*                  |
| 242.9827                | <0.00005       | <0.0                      | 0.08                       |                                      |
| 103.0636                | <0.0005        | <0.05                     | 4.82                       | gamma-Aminobutyric acid <sup>#</sup> |
| 109.0199                | <0.0005        | <0.05                     | 35.06                      |                                      |
| 161.1051                | <0.001         | <0.05                     | 6.31                       | Carnitine <sup>#</sup>               |
| 89.0481                 | <0.001         | <0.05                     | 3.3                        |                                      |

*note: [\*]compounds identified based on fragmentation spectra; [#]compounds identified based on accurate parent mass*

Table S13. Panel of compounds representing differences between patients with and without 1p19q codeletion selected via the LASSO method using a PFP column in positive ionization mode.

| <b>Molecular weight</b> | <b>P-value</b> | <b>P-value correction</b> | <b>Ratio [Deletion/no-deletion]</b> | <b>Identification</b>                                                                               |
|-------------------------|----------------|---------------------------|-------------------------------------|-----------------------------------------------------------------------------------------------------|
| 89.0481                 | <0.001         | <0.01                     | 0.2                                 |                                                                                                     |
| 103.0999                | <0.0005        | <0.01                     | 0.43                                | Neurine <sup>#</sup>                                                                                |
| 119.0583                | <0.005         | <0.01                     | 0.31                                | Threonine <sup>*</sup>                                                                              |
| 122.0481                | <0.005         | <0.01                     | 0.37                                | <b>Nicotinamide</b> (Niacinamide) <sup>#</sup>                                                      |
| 163.1207                | <0.05          | <0.1                      | 2.42                                |                                                                                                     |
| 215.0557                | <0.05          | <0.1                      | 4.46                                | sn-glycero-3-Phosphoethanolamine <sup>#</sup><br>Glycerolphosphorylethanolamine <sup>#</sup>        |
| 244.0692                | <0.5           | <0.5                      | 1.27                                |                                                                                                     |
| 248.1521                | <0.5           | <0.5                      | 0.61                                |                                                                                                     |
| 332.292                 | <0.01          | <0.05                     | 1.9                                 |                                                                                                     |
| 386.1724                | <0.5           | <0.5                      | 1.69                                |                                                                                                     |
| 430.3079                | <0.5           | <0.5                      | 0.13                                | 25-Hydroxyvitamin D3-26,23-lactol <sup>#</sup><br>24-Oxo-1alpha,25-dihydroxyvitamin D3 <sup>#</sup> |
| 612.1513                | <0.05          | <0.05                     | 0.16                                |                                                                                                     |
| 612.1513                | <0.5           | <0.05                     | 0.16                                | Oxidized glutathione (GSSG) <sup>#</sup>                                                            |

*note: [\*]compounds identified based on fragmentation spectra; [#]compounds identified based on accurate parent mass*

Table S14: Comparison of masses selected via LASSO for the analysis of patients with/without codeletion using different columns and ionization modes.

| Deletion               |                        |                      |                      |
|------------------------|------------------------|----------------------|----------------------|
| <b>HILIC_neg</b>       | <b>HILIC_pos</b>       | <b>PFP_neg</b>       | <b>PFP_pos</b>       |
| <i>(HILIC_neg_D31)</i> | <i>(HILIC_pos_D36)</i> | <i>(PFP_neg_D27)</i> | <i>(PFP_pos_D30)</i> |
| 106.0248               |                        |                      |                      |
| 115.0258               |                        |                      | 89.0481              |
| 131.0931               | 105.0793               |                      | 103.0999             |
| 134.9976               | 115.0634               | 134.9976             | 119.0583             |
| 136.0356               | 152.1313               | 196.0575             | 122.0481             |
| 148.0358               | 215.0557               | 222.067              | 163.1207             |
| 161.0676               | 243.2197               | 236.9487             | 215.0557             |
| 203.9937               | 248.1522               | 251.1519             | 244.0692             |
| 256.2399               | 255.2558               | 255.1318             | 248.1521             |
| 262.2295               | 267.0965               | 289.1275             | 332.2920             |
| 317.1239               | 287.1914               | 331.0766             | 386.1724             |
| 329.0526               | 315.2228               | 388.1221             | 430.3079             |
| 370.163                | 353.3039               | 612.1526             | 612.1513             |
| 484.1286               | 925.2621               |                      | 684.1794             |

Table S15. Statistical performance of PLS-DA for patients with and without 1p19q codeletion. Data for PFP column acquired in ESI- mode; data for HILIC column acquired in ESI+ and ESI- mode.

| <b>Parameter</b>                     | <b>Model 8</b><br>(HILIC_neg) |                  | <b>Model 9</b><br>(HILIC_pos) |                  | <b>Model 10</b><br>(PFP_neg) |                  |
|--------------------------------------|-------------------------------|------------------|-------------------------------|------------------|------------------------------|------------------|
| <b>Classes</b>                       | deletion                      | without deletion | deletion                      | without deletion | Deletion                     | without deletion |
| <b>N</b>                             | 7                             | 12               | 7                             | 12               | 7                            | 12               |
| <b>Data preprocessing</b>            | autoscale                     |                  | autoscale                     |                  | autoscale                    |                  |
| <b>Number of LV</b>                  | 3                             |                  | 2                             |                  | 2                            |                  |
| <b>RMSEC</b>                         | 0.153                         | 0.153            | 0.148                         | 0.148            | 0.102                        | 0.102            |
| <b>RMSECV</b>                        | 0.805                         | 0.805            | 0.319                         | 0.319            | 0.192                        | 0.192            |
| <b>R<sup>2</sup>(calibration)</b>    | 0.898                         | 0.898            | 0.905                         | 0.905            | 0.955                        | 0.955            |
| <b>R<sup>2</sup>(CV)</b>             | 0.302                         | 0.302            | 0.638                         | 0.638            | 0.854                        | 0.854            |
| <b>NMC</b>                           |                               |                  |                               |                  |                              |                  |
| <b>Calibration</b>                   | 0                             | 0                | 0                             | 0                | 0                            | 0                |
| <b>Cross-validation</b>              | 2                             | 1                | 1                             | 0                | 0                            | 0                |
| <b>AUROC</b>                         |                               |                  |                               |                  |                              |                  |
| <b>Calibration</b>                   | 1.000                         | 1.000            | 1.000                         | 1.000            | 1.000                        | 1.000            |
| <b>Cross-validation</b>              | 0.905                         | 0.905            | 1.000                         | 1.000            | 1.000                        | 1.000            |
| <b>Permutation test</b><br>(N = 150) |                               |                  |                               |                  |                              |                  |
| <b>Self-Prediction</b>               | Failed                        |                  | Passed                        |                  | Passed                       |                  |
| <b>Cross-validated</b>               | Failed                        |                  | Passed                        |                  | Passed                       |                  |

Table S16. Compounds differentiating patients with and without 1p19q codeletion selected via ANOVA using a PFP column in positive ionization mode.

| <b>Molecular weight</b> | <b>P-value</b> | <b>P-value correction</b> | <b>Ratio [no-deletion/deletion]</b> | <b>Identification</b>               |
|-------------------------|----------------|---------------------------|-------------------------------------|-------------------------------------|
| 222.0669                | <0.05          | <0.5                      | 0.22                                | Cystathionine*                      |
| 155.0683                | <0.00000005    | <0.000005                 | 768.24                              |                                     |
| 612.1526                | <0.00005       | <0.0005                   | 62.75                               |                                     |
| 268.0807                | <0.00005       | <0.0005                   | 76.21                               | Arabinosylhypoxanthine <sup>#</sup> |
| 354.1680                | <0.0005        | <0.005                    | 0.01                                | Iclaprim <sup>#</sup>               |
| 417.1638                | <0.001         | <0.01                     | 0.03                                |                                     |
| 272.9020                | <0.005         | <0.05                     | 0.05                                |                                     |
| 112.0257                | <0.005         | <0.05                     | 2.62                                |                                     |

*note: [\*]compounds identified based on fragmentation spectra; [#]compounds identified based on accurate parent mass*

Figure S1. PLS-DA scores plots presenting differences between groups of patients with and without IDH mutations. Patients with IDH mutations—blue circles; patients without IDH mutations—green squares. Analyses were performed on an HILIC column in negative ionization mode (Model 5), an HILIC column in positive ionization mode (Model 6), and a PFP column in negative ionization mode (Model 7).

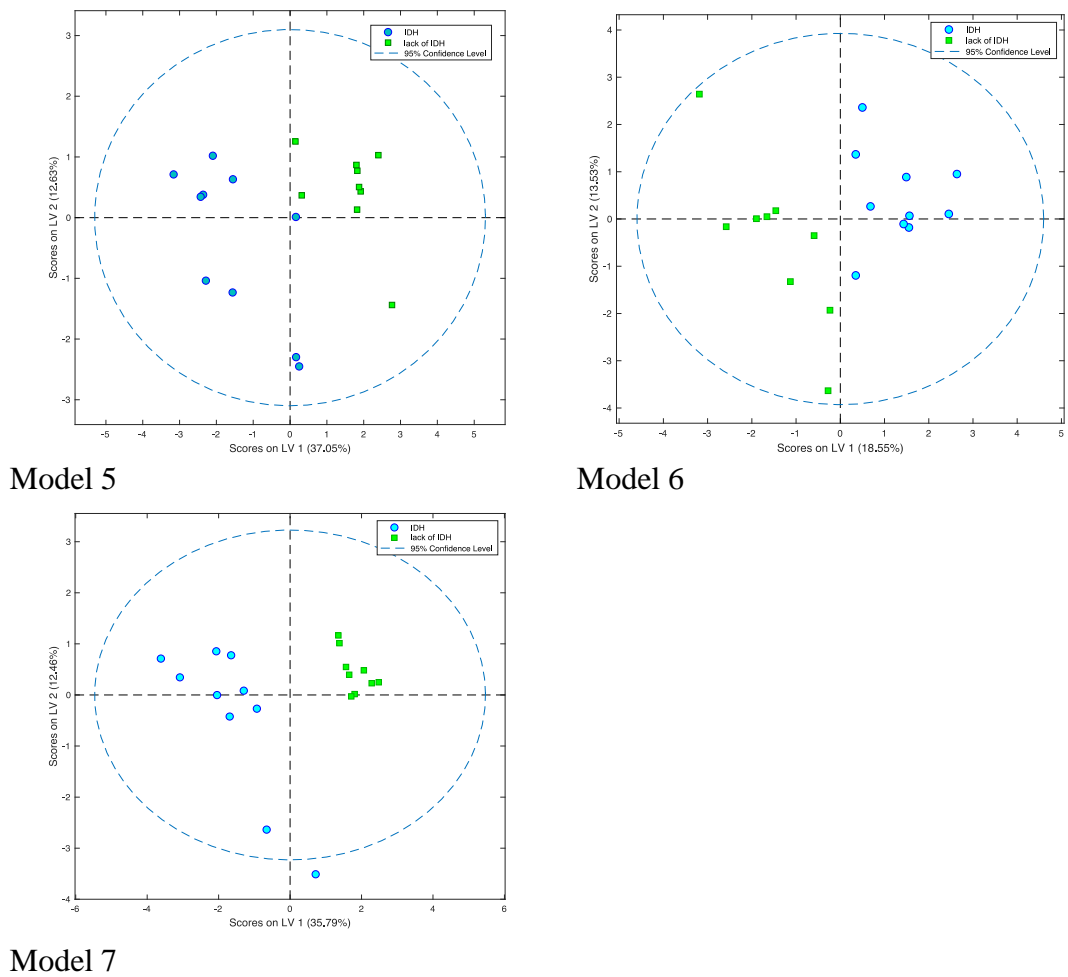

Figure S2. PLS-DA score plots showing differences between groups of patients with and without codeletion 1p19q. Patients with codeletion—blue circles; patients without codeletion—green squares. Analyses were performed on an HILIC column in negative ionization mode (Model 8); an HILIC column in positive ionization mode (Model 9); and a PFP column in negative ionization mode (Model 10).

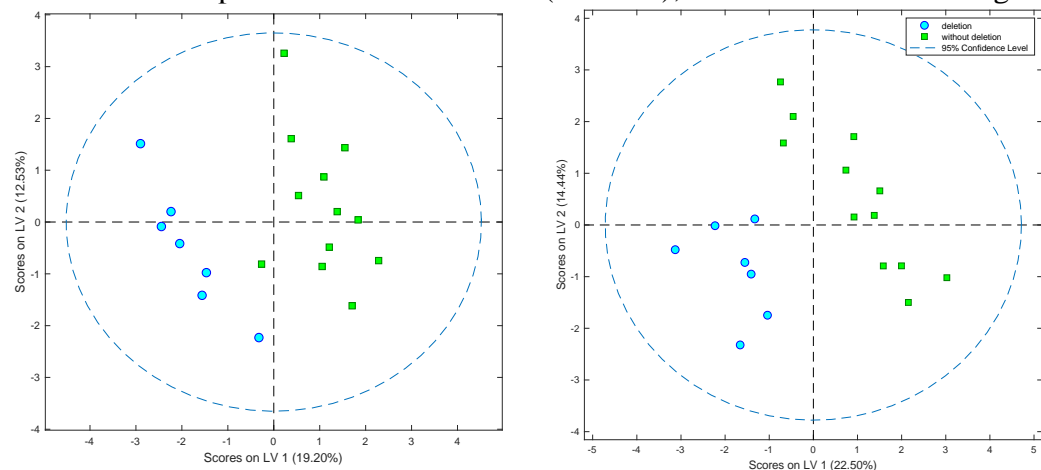

Model 8

Model 9

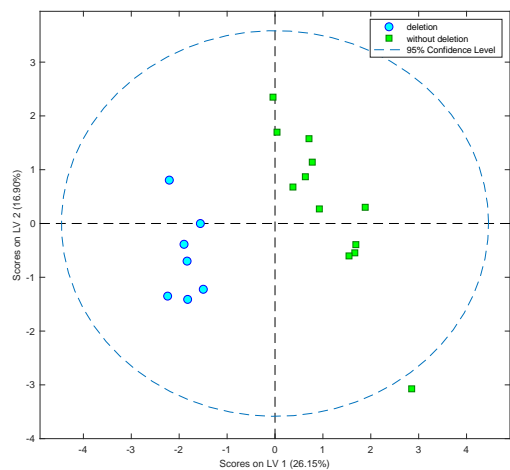

Model 10
